# Supplementary material for: Cost–Utility of First-Line Actinic Keratosis Treatments in Finland
Source: Springer Nature journal article supplement (doi:10.1007/s12325-015-0211-7), 2015-05-01
Supplement: MOESM1 [file 9203502]

## Appendix 1. Complete clearance results based on Bayesian network meta-analysis

A systematic review (SR) was conducted for the Scottish Medicines Consortium [63] to identify randomized clinical trial (RCT) data from the published literature reporting on the efficacy and safety of AK interventions. There were no restrictions on formulation, dose, mode of delivery or treatment duration in the SR. Following Tables 1A-1C show the databases and search terms used, and hits obtained. Figure 1A depicts the PRISMA flow diagram. Table 1D reports the included and Table 1E the excluded studies.

Table 1A. EMBASE 1980 to 2011 week 18 (09/05/2011) search

|    | Searches                                                                                  | Results |
|----|-------------------------------------------------------------------------------------------|---------|
| 1  | ACTINIC KERATOSIS/                                                                        | 3076    |
| 2  | KERATOSIS/                                                                                | 4311    |
| 3  | actinic.tw.                                                                               | 4224    |
| 4  | 2 and 3                                                                                   | 272     |
| 5  | 1 or 4                                                                                    | 3315    |
| 6  | ((actinic or solar) adj keratos\$.tw.                                                     | 2484    |
| 7  | (ak or aks).tw.                                                                           | 3524    |
| 8  | or/5-7                                                                                    | 6866    |
| 9  | (peplin or pep005 or "pep 005" or ingenol mebutate).mp.                                   | 71      |
| 10 | (imiquimod or aldera or r837 or r 837 or s26308 or s 26308 or zyclara or zartra).mp.      | 3854    |
| 11 | *CRYOTHERAPY/                                                                             | 2419    |
| 12 | *CRYOSURGERY/                                                                             | 5080    |
| 13 | (cryotherapy or cryosurgery).mp.                                                          | 19381   |
| 14 | (diclofenac or solaraze).mp.                                                              | 24146   |
| 15 | (fluorouracil or 5fu or 5 fu or f5u or carac or efudex or efudex or fluoroplex).mp.       | 85600   |
| 16 | *salicylic acid/                                                                          | 5557    |
| 17 | salicylic acid.mp.                                                                        | 24410   |
| 18 | (tretinoin or aberela or airoi or renova or altralin or retin-A or avita or stieva-A).mp. | 1852    |
| 19 | (afamelanotide or scenesse).mp.                                                           | 24      |
| 20 | sotirimod.mp.                                                                             | 4       |
| 21 | LAS41007.mp.                                                                              | 0       |
| 22 | oleogel.mp.                                                                               | 18      |
| 23 | *PHOTOCHEMOTHERAPY/                                                                       | 2965    |
| 24 | *photodynamic therapy/                                                                    | 6058    |
| 25 | (photochemotherapy or photodynamic therapy or pdt).mp.                                    | 18880   |
| 26 | or/9-25                                                                                   | 171760  |
| 27 | Clinical trial/                                                                           | 831875  |
| 28 | Randomized controlled trial/                                                              | 294861  |
| 29 | Randomization/                                                                            | 54154   |
| 30 | Single blind procedure/                                                                   | 14245   |
| 31 | Double blind procedure/                                                                   | 103063  |
| 32 | Crossover procedure/                                                                      | 30843   |
| 33 | Placebo/                                                                                  | 180074  |
| 34 | Randomi?ed controlled trial\$.tw.                                                         | 61947   |
| 35 | Rct.tw.                                                                                   | 6890    |

|    |                                     |         |
|----|-------------------------------------|---------|
| 36 | Random allocation.tw.               | 1035    |
| 37 | Randomly allocated.tw.              | 15527   |
| 38 | Allocated randomly.tw.              | 1706    |
| 39 | (allocated adj2 random).tw.         | 687     |
| 40 | Single blind\$.tw.                  | 11019   |
| 41 | Double blind\$.tw.                  | 118354  |
| 42 | ((treble or triple) adj blind\$.tw. | 241     |
| 43 | Placebo\$.tw.                       | 158909  |
| 44 | Prospective study/                  | 168821  |
| 45 | or/27-44                            | 1138209 |
| 46 | Case study/                         | 11851   |
| 47 | Case report.tw.                     | 200093  |
| 48 | Abstract report/ or letter/         | 779679  |
| 49 | or/46-48                            | 987817  |
| 50 | 45 not 49                           | 1105427 |
| 51 | 8 and 26 and 50                     | 562     |

*Table 1B. Ovid MEDLINE(R) In-Process & Other Non-Indexed Citations and Ovid MEDLINE(R) 1948 to 09/05/2011 search*

| #  | Searches                                                                                                                               | Results |
|----|----------------------------------------------------------------------------------------------------------------------------------------|---------|
| 1  | Keratosis, Actinic/                                                                                                                    | 225     |
| 2  | Keratosis/                                                                                                                             | 6039    |
| 3  | actinic.tw.                                                                                                                            | 3425    |
| 4  | 2 and 3                                                                                                                                | 863     |
| 5  | 1 or 4                                                                                                                                 | 1086    |
| 6  | ((actinic or solar) adj keratos\$.tw.                                                                                                  | 1952    |
| 7  | (ak or aks).tw.                                                                                                                        | 3373    |
| 8  | or/5-7                                                                                                                                 | 5029    |
| 9  | (peplin or pep005 or "pep 005" or ingenol mebutate).mp.                                                                                | 25      |
| 10 | (imiquimod or aldera or r837 or r 837 or s26308 or s 26308 or zartra or zyclara).mp.                                                   | 1507    |
| 11 | (fluorouracil or 5fu or 5 fu or f5u or carac or efudex or effudix or nsc18913 or nsc 18913 or nsc19893 or nsc 19893 or fluoroplex).mp. | 38272   |
| 12 | (tretinoin or aberela or airol or renova or altralin or retin-A or avita or stieva-A).mp.                                              | 17739   |
| 13 | *Cryotherapy/                                                                                                                          | 1606    |
| 14 | *Cryosurgery/                                                                                                                          | 6738    |
| 15 | (cryotherapy or cryosurgery).mp.                                                                                                       | 14974   |
| 16 | (diclofenac or solaraze).mp.                                                                                                           | 7410    |
| 17 | *Salicylic Acid/                                                                                                                       | 1242    |
| 18 | salicylic acid.mp.                                                                                                                     | 7669    |
| 19 | (afamelanotide or scencesse).mp.                                                                                                       | 10      |
| 20 | sotirimod.mp.                                                                                                                          | 0       |
| 21 | LAS41007.mp.                                                                                                                           | 0       |
| 22 | oleogel.mp.                                                                                                                            | 11      |
| 23 | *Photochemotherapy/                                                                                                                    | 8073    |
| 24 | *Photodynamic therapy/                                                                                                                 | 8073    |

|    |                                                                           |         |
|----|---------------------------------------------------------------------------|---------|
| 25 | (photochemotherapy or photodynamic therapy or pdt).mp.                    | 14208   |
| 26 | or/9-25                                                                   | 100516  |
| 27 | Randomized controlled trials as Topic/                                    | 72681   |
| 28 | Randomized controlled trial/                                              | 305699  |
| 29 | Random allocation/                                                        | 71251   |
| 30 | Double blind method/                                                      | 109596  |
| 31 | Single blind method/                                                      | 14866   |
| 32 | Clinical trial/                                                           | 462178  |
| 33 | exp Clinical Trials as Topic/                                             | 240326  |
| 34 | or/27-33                                                                  | 771733  |
| 35 | (clinic\$ adj trial\$1).tw.                                               | 161144  |
| 36 | ((singl\$ or doubl\$ or treb\$ or tripl\$) adj (blind\$3 or mask\$3)).tw. | 109859  |
| 37 | Placebos/                                                                 | 29537   |
| 38 | Placebo\$.tw.                                                             | 132156  |
| 39 | Randomly allocated.tw.                                                    | 13050   |
| 40 | (allocated adj2 random).tw.                                               | 673     |
| 41 | or/35-40                                                                  | 334747  |
| 42 | 34 or 41                                                                  | 881036  |
| 43 | Case report.tw.                                                           | 166800  |
| 44 | Letter/                                                                   | 728238  |
| 45 | Historical article/                                                       | 273973  |
| 46 | Review of reported cases.pt.                                              | 0       |
| 47 | Review, multicase.pt.                                                     | 0       |
| 48 | or/43-47                                                                  | 1159124 |
| 49 | 42 not 48                                                                 | 855990  |
| 50 | 8 and 26 and 49                                                           | 240     |

Table 1C. Cochrane Library (09/05/11) search

| ID  | Search                                                                                                                                      | Hits |
|-----|---------------------------------------------------------------------------------------------------------------------------------------------|------|
| #1  | MeSH descriptor Keratosis, Actinic explode all trees                                                                                        | 41   |
| #2  | (actinic keratosis or solar keratosis):ti,ab,kw                                                                                             | 126  |
| #3  | (ak or aks):ti,ab,kw                                                                                                                        | 160  |
| #4  | (actinic):ti,ab,kw                                                                                                                          | 261  |
| #5  | (keratosis):ti,ab,kw                                                                                                                        | 243  |
| #6  | (#4 AND #5)                                                                                                                                 | 179  |
| #7  | (#1 OR #2 OR #3 OR #6)                                                                                                                      | 263  |
| #8  | (peplin or pep005 or "pep 005" or ingenol mebutate):ti,ab,kw                                                                                | 3    |
| #9  | (imiquimod or aldera or r837 or r 837 or s26308 or s 26308 or zartra or zyclara):ti,ab,kw                                                   | 164  |
| #10 | (imiquimod or aldera or r837 or r 837 or s26308 or s 26308 or zartra or zyclara):ti,ab,kw                                                   | 164  |
| #11 | (fluorouracil or 5fu or 5 fu or f5u or carac or efudex or effudix or nsc18913 or nsc 18913 or nsc19893 or nsc 19893 or fluoroplex):ti,ab,kw | 6083 |
| #12 | (tretinoin or aberela or airol or renova or altralin or retin-A or avita or stieva-A):ti,ab,kw                                              | 636  |
| #13 | MeSH descriptor Cryotherapy explode all trees                                                                                               | 952  |
| #14 | MeSH descriptor Cryosurgery explode all trees                                                                                               | 248  |
| #15 | (cryotherapy or cryosurgery):ti,ab,kw                                                                                                       | 918  |

|     |                                                                                                              |       |
|-----|--------------------------------------------------------------------------------------------------------------|-------|
| #16 | (diclofenac or solaraze):ti,ab,kw                                                                            | 2432  |
| #17 | (salicylic acid):ti,ab,kw                                                                                    | 658   |
| #18 | MeSH descriptor Photochemotherapy explode all trees                                                          | 474   |
| #19 | (photochemotherapy or photodynamic therapy or PDT):ti,ab,kw                                                  | 963   |
| #20 | (afamelanotide or scenesse):ti,ab,kw                                                                         | 1     |
| #21 | (sotirimod):ti,ab,kw                                                                                         | 0     |
| #22 | (LAS41007):ti,ab,kw                                                                                          | 0     |
| #23 | (oleogel):ti,ab,kw                                                                                           | 1     |
| #24 | (#8 OR #9 OR #10 OR #11 OR #12 OR #13 OR #14 OR #15 OR #16 OR #17 OR #18 OR #19 OR #20 OR #21 OR #22 OR #23) | 12258 |
| #25 | (#7 AND #24)                                                                                                 | 138   |

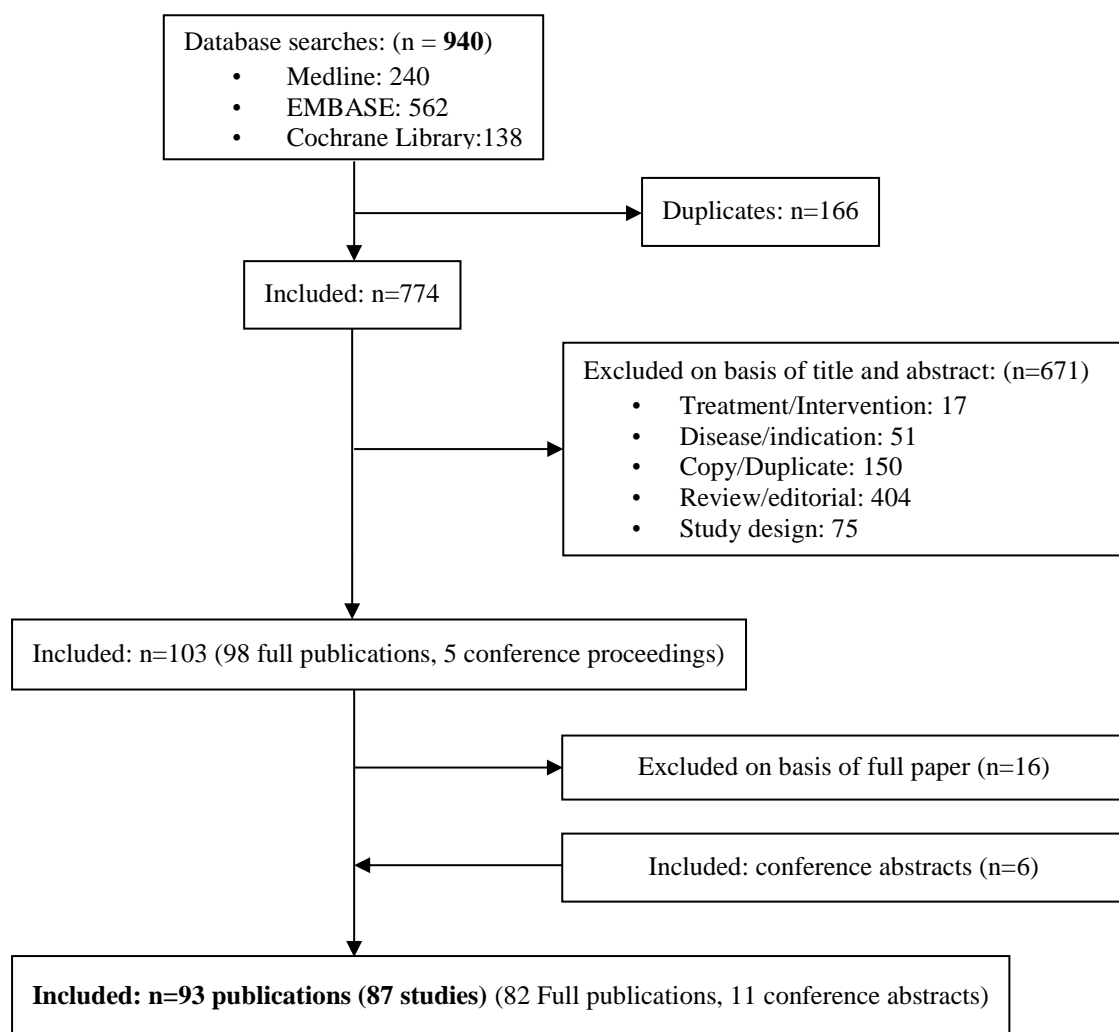

Figure 1A. PRISMA flow diagram

Table 1D. Included studies

| First author                    | Citation                                                                                    |
|---------------------------------|---------------------------------------------------------------------------------------------|
| <b>Full publications (n=82)</b> |                                                                                             |
| Akarsu S                        | Clinical and Experimental Dermatology, 2011.                                                |
| Alexiades- Armenakas MR         | Archives of Dermatology, 2003. 139 (10): p. 1313-20.                                        |
| Alirezai M                      | Journal of the American Academy of Dermatology, 1994. 30 (3): p. 447-451.                   |
| Alomar A                        | British Journal of Dermatology, 2007. 157 (1): p. 133-141.                                  |
| Anderson L                      | Journal of the American Academy of Dermatology, 2009. 60 (6): p. 934-943                    |
| Apalla Z                        | Journal of Dermatology. 162 (1): p. 171-175.                                                |
| Babilas P                       | British Journal of Dermatology, 2007. 157 (1): p. 111-117.                                  |
| Babilas P                       | Journal der Deutschen Dermatologischen Gesellschaft, 2008. 6(1): p. 25-32                   |
| Bercovitch L                    | British Journal of Dermatology, 1987. 116 (4): p. 549-552.                                  |
| Berlin JM                       | Journal of drugs in dermatology : JDD, 2008. 7 (7): p. 669-673                              |
| Braathen LR                     | Journal of the European Academy of Dermatology and Venereology, 2009. 23 (5): p. 550-555.   |
| Chen K                          | Australasian Journal of Dermatology, 2003. 44 (4): p. 250-255                               |
| Dragieva G                      | British Journal of Dermatology, 2004. 151 (1): p. 196-200.                                  |
| Ericson MB                      | British Journal of Dermatology, 2004. 151 (6): p. 1204-1212.                                |
| Fariba I                        | Indian Journal of Dermatology, Venereology and Leprology, 2006. 72 (5): p. 346-349.         |
| Fowler JF                       | Cutis, 2002. 69(6 Suppl): p. 2-7.                                                           |
| Freeman M                       | Journal of Dermatological Treatment, 2003. 14 (2): p. 99-106.                               |
| Gebauer KP                      | Australasian Journal of Dermatology, 2003. 44 (1): p. 40-43.                                |
| Gebauer K                       | British Journal of Dermatology, 2009, 161 (4): p. 897-903.                                  |
| Grimaitre M                     | Dermatology, 2000. 200 (4): p. 346-348.                                                     |
| Hanke CW                        | Journal of the American Academy of Dermatology, 2010. 62 (4): p. 573-581.                   |
| Hantash BM                      | Archives of Dermatology, 2006. 142 (8): p. 976-982.                                         |
| Hauschild A                     | Experimental Dermatology, 2009. 18 (2): p. 116-121                                          |
| Hauschild A                     | The British journal of dermatology, 2009;1066-74.                                           |
| Huyke C                         | Journal of the German Society of Dermatology, 2009. 7 (2): p. 128-134                       |
| Jeffes EW                       | Journal of the American Academy of Dermatology, 2001. 45 (1): p. 96-104.                    |
| Jorizzo J                       | Journal of the American Academy of Dermatology, 2007. 57 (2): p. 265-268                    |
| Jorizzo J                       | Cutis; cutaneous medicine for the practitioner, 2002. 70 (6): p. 335-339                    |
| Jorizzo J                       | Archives of Dermatology, 2004. 140 (7): p. 813-816.                                         |
| Jorizzo J                       | Journal of drugs in dermatology : JDD, 2006. 5 (2): p. 133-139.                             |
| Jorizzo J                       | Journal of drugs in dermatology : JDD, 9 (9): p. 1101-1108.                                 |
| Jury CS                         | British Journal of Dermatology, 2005. 153 (4): p. 808-810                                   |
| Kaufmann R                      | British Journal of Dermatology, 2008. 158 (5): p. 994-999.                                  |
| Korman N                        | Archives of Dermatology, 2005. 141 (4): p. 467-473                                          |
| Kose O                          | Journal of Dermatological Treatment, 2008. 19 (3): p. 159-163.                              |
| Krawtchenko N                   | British Journal of Dermatology, 2007. 157 (SUPPL. 2): p. 34-40.                             |
| Kurwa HA                        | Journal of the American Academy of Dermatology, 1999. 41(3 Pt 1): p. 414-8.                 |
| Langan SM                       | British Journal of Dermatology, 2006. 154 (1): p. 146-149.                                  |
| Lebwohl M                       | Journal of the American Academy of Dermatology, 2004. 50 (5): p. 714-721.                   |
| Levy S                          | Clinical Therapeutics, 2001. 23 (6): p. 908-920.                                            |
| Loven K                         | Clinical Therapeutics, 2002. 24 (6): p. 990-1000.                                           |
| Marrero GM                      | Dermatologic Surgery, 1998. 24(9): p. 973-8.                                                |
| McEwan LE                       | Australasian Journal of Dermatology, 1997. 38 (4): p. 187-189.                              |
| Misiewicz J                     | Journal of the American Academy of Dermatology, 1991. 24 (3): p. 448-451.                   |
| Moloney FJ                      | British Journal of Dermatology, 2007. 157 (1): p. 87-91.                                    |
| Moriarty M                      | Lancet, 1982. 1(8268): p. 364-5.                                                            |
| Morton C                        | British Journal of Dermatology, 2006. 155(5): p. 1029-36.                                   |
| Ooi T                           | British Journal of Dermatology, 2006. 154 (1): p. 72-78.                                    |
| Ostertag JU                     | Lasers in Surgery and Medicine, 2006. 38 (8): p. 731-739.                                   |
| Pariser D                       | Journal of the American Academy of Dermatology, 2008. 59 (4): p. 569-576.                   |
| Pariser DM                      | Journal of the American Academy of Dermatology, 2003. 48 (2 SUPPL.): p. 227-232.            |
| Piacquadio DJ                   | Archives of Dermatology, 2004; 41-6.                                                        |
| Radakovic-Fijan S               | Journal of the American Academy of Dermatology, 2005. 53 (5): p. 823-827.                   |
| Rivers JL                       | British Journal of Dermatology, 2002. 146 (1): p. 94-100.                                   |
| Serra-Guillen C                 | British Journal of Dermatology. 164 (2): p. 429-433.                                        |
| Shaffelburg M                   | Journal of drugs in dermatology, 2009. 8 (1): p. 35-39.                                     |
| Siller G                        | Australasian Journal of Dermatology, 2009. 50 (1): p. 16-22.                                |
| Smith S                         | Journal of drugs in dermatology, 2003. 2 (6): p. 629-635.                                   |
| Smith SR                        | Journal of drugs in dermatology : JDD, 2006. 5 (2): p. 156-159.                             |
| Sotiriou E                      | Journal of the European Academy of Dermatology and Venereology, 2009. 23 (9): p. 1061-1065. |
| Stockfleth E                    | Archives of Dermatology, 2002. 138 (11): p. 1498-1502                                       |
| Swanson N                       | Journal of the American Academy of Dermatology, 2010. 62 (4): p. 582-590.                   |
| Szeimies RM                     | Journal of the American Academy of Dermatology, 2002. 47 (2): p. 258-262.                   |
| Szeimies RM                     | Dermatologic surgery 2009; 586-92.                                                          |
| Szeimies RM                     | British Journal of Dermatology. 163 (2): p. 386-394.                                        |

|                                                  |                                                                                                    |
|--------------------------------------------------|----------------------------------------------------------------------------------------------------|
| Szeimies RM                                      | British Journal of Dermatology, 2010. 162 (2): p. 410-414.                                         |
| Szeimies RM                                      | Journal of the American Academy of Dermatology, 2004. 51(4): p. 547-55.                            |
| Tanghetti E                                      | Journal of drugs in dermatology : JDD, 2007. 6 (2): p. 144-147.                                    |
| Tan JKL                                          | Journal of Cutaneous Medicine and Surgery, 2007. 11 (6): p. 195-201.                               |
| Tarstedt M                                       | Acta Dermato-Venereologica, 2005. 85(5): p. 424-8.                                                 |
| Torres A                                         | Journal of Translational Medicine, 2007. 5(7).                                                     |
| Ulrich C                                         | British Journal of Dermatology, 2007. 157 (SUPPL. 2): p. 25-31.                                    |
| Ulrich C                                         | European Journal of Dermatology. 20 (4): p. 482-488.                                               |
| Van Der Geer S                                   | Journal of Dermatological Treatment, 2009. 20 (5): p. 259-265.                                     |
| Von Felbert V                                    | British Journal of Dermatology. 163 (3): p. 607-615.                                               |
| Weiss J                                          | Cutis; cutaneous medicine for the practitioner, 2002. 70 (2 Suppl): p. 22-29.                      |
| Wennberg AM                                      | Transplantation, 2008. 86 (3): p. 423-429.                                                         |
| Wiegell SR                                       | British Journal of Dermatology, 2009. 160 (6): p. 1308-1314.                                       |
| Wiegell SR                                       | British Journal of Dermatology, 2008. 158 (4): p. 740-746.                                         |
| Wolf JE                                          | International Journal of Dermatology, 2001. 40 (11): p. 709-713.                                   |
| Zeichner JA                                      | Journal of the American Academy of Dermatology, 2009. 60 (1): p. 59-62.                            |
| <b>Abstracts (conference proceedings) (n=11)</b> |                                                                                                    |
| Anderson LL                                      | American Academy of Dematology 2010 Annual Meeting, 2010.                                          |
| Apalla Z                                         | 6th Congress of the European Association of Dermatologic Oncology Athens Greece. 2010. 20: p. e73. |
| Berman B                                         | American Academy of Dematology 2010 Annual Meeting, 2010.                                          |
| Dirschka T                                       | JDDG - Journal of the German Society of Dermatology. Conference Publication. 9: p. 196-197.        |
| Epstein E                                        | The British journal of dermatology, 2006; 794-5                                                    |
| Lebwohl ML                                       | American Academy of Dematology 2010 Annual Meeting, 2010.                                          |
| Lee J                                            | Journal of the American Academy of Dermatology, 2010. (var.pagings). 64 (2 SUPPL. 1): p. AB2.      |
| Schmieder G                                      | American Academy of Dematology 2010 Annual Meeting, 2010. P2915.                                   |
| Spencer J                                        | American Academy of Dematology 2010 Annual Meeting, 2010. P2913.                                   |
| Swanson N                                        | American Academy of Dematology 2010 Annual Meeting, 2010.                                          |
| Ulrich C                                         | Journal of the American Academy of Dermatology 2010; (var.pagings): 62 (3 SUPPL. 1): p. AB107.     |

Table 1E. Excluded studies

| Reference (first author, Journal)                                                                     | Reason for exclusion                                                                                                           |
|-------------------------------------------------------------------------------------------------------|--------------------------------------------------------------------------------------------------------------------------------|
| Clinical study report of PEP-005.                                                                     | Non-RCT                                                                                                                        |
| Dijkstra AT. Journal of the European Academy of Dermatology and Venereology, 2001. 15 (6): p. 550-554 | Non-RCT                                                                                                                        |
| Dragieva G. Transplantation, 2004. 77(1): p. 115-21.                                                  | Non-RCT                                                                                                                        |
| FritschC. Photodermatology Photoimmunology and Photomedicine, 1997. 13 (5-6): p. 181-185.             | Non-RCT                                                                                                                        |
| Hanke CW. Journal of Drugs in Dermatology. 10(2): p. 165-70.                                          | Follow up of previously published and included data                                                                            |
| Jeffes EW. Archives of Dermatology, 1997. p: 727-32.                                                  | Non-RCT                                                                                                                        |
| Lee PK. Dermatologic surgery, 2005. 31 (6): p. 659-664.                                               | Non-RCT                                                                                                                        |
| Medina J. Biochemical Pharmacology, 2003. 66(10): p. 1885-95.                                         | In vitro (human reconstructed epidermis), and in vivo using minipigs                                                           |
| Naylor MF. Archives of Dermatology, 1995. 131 (2): p. 170-175.                                        | Treatment – sun protection factor sunscreen (treatment group) and sunscreen base (placebo group)                               |
| Perrett CM. British Journal of Dermatology, 2007. 156 (2): p. 320-328.                                | Mixed study population (epidermal dysplasia : multiple AKs and/or carcinoma in situ). No subgroup results on patients with AKs |
| Puizina-Ivic N. Collegium antropologicum, 2008. 32 Suppl 2: p. 67-73.                                 | Non-RCT and non-relevant outcome (fluorescence intensity)                                                                      |
| Simmonds WL. Cutaneous Medicine for the Practitioner, 1973. 12(1): p. 615-617.                        | Non-RCT and non-relevant outcome (investigator judgement of whether the treatment area responded better or not)                |
| Tanghetti EA. Cosmetic Dermatology, 2004. 17 (11 SUPPL. 3): p. 16-20.                                 | Non-RCT                                                                                                                        |
| Torres A. The British journal of dermatology, 1132-47.                                                | Non relevant outcome - microarray analysis of gene expression from a previous included study                                   |
| Weinstock MA. Journal of the American Academy of Dermatology, 2009. 61 (2): p. 207-215.               | Non-RCT                                                                                                                        |
| Wulf HC. Acta Dermato-Venereologica, 2006. 86 (1): p. 25-28.                                          | Mixed study population (actinic keratosis, basal cell carcinoma, warts). No subgroup results on patients with AKs              |

Outcomes of interest for the purposes of the economic model included complete clearance (CC) rates of AK lesions, AK recurrence rates, time to occurrence of new AK-lesions, and LSRs. CC was defined as no AK lesions remaining following treatment. The SR data were analyzed further in a Bayesian network meta-analysis (NMA) setting to obtain comparative log odds ratios (LOR) for CC rates. The NMA models were fitted to the data using Bayesian Markov Chain Monte Carlo methods (Gibbs sampling), which was conducted using the WinBUGS software version 1.4.1.

To calculate the absolute probability of events occurring for each treatment, the absolute risk for the reference treatment was needed. The reference treatment was chosen to be the treatment that has the most data available. First a (frequentist) random-effects MA was done to pool data on the log-odds of responding to the reference control treatment. The mean and SD pooled log-odds of responding to the reference treatment were then used as priors in the main NMA to inform the calculation of the absolute efficacy of each treatment.

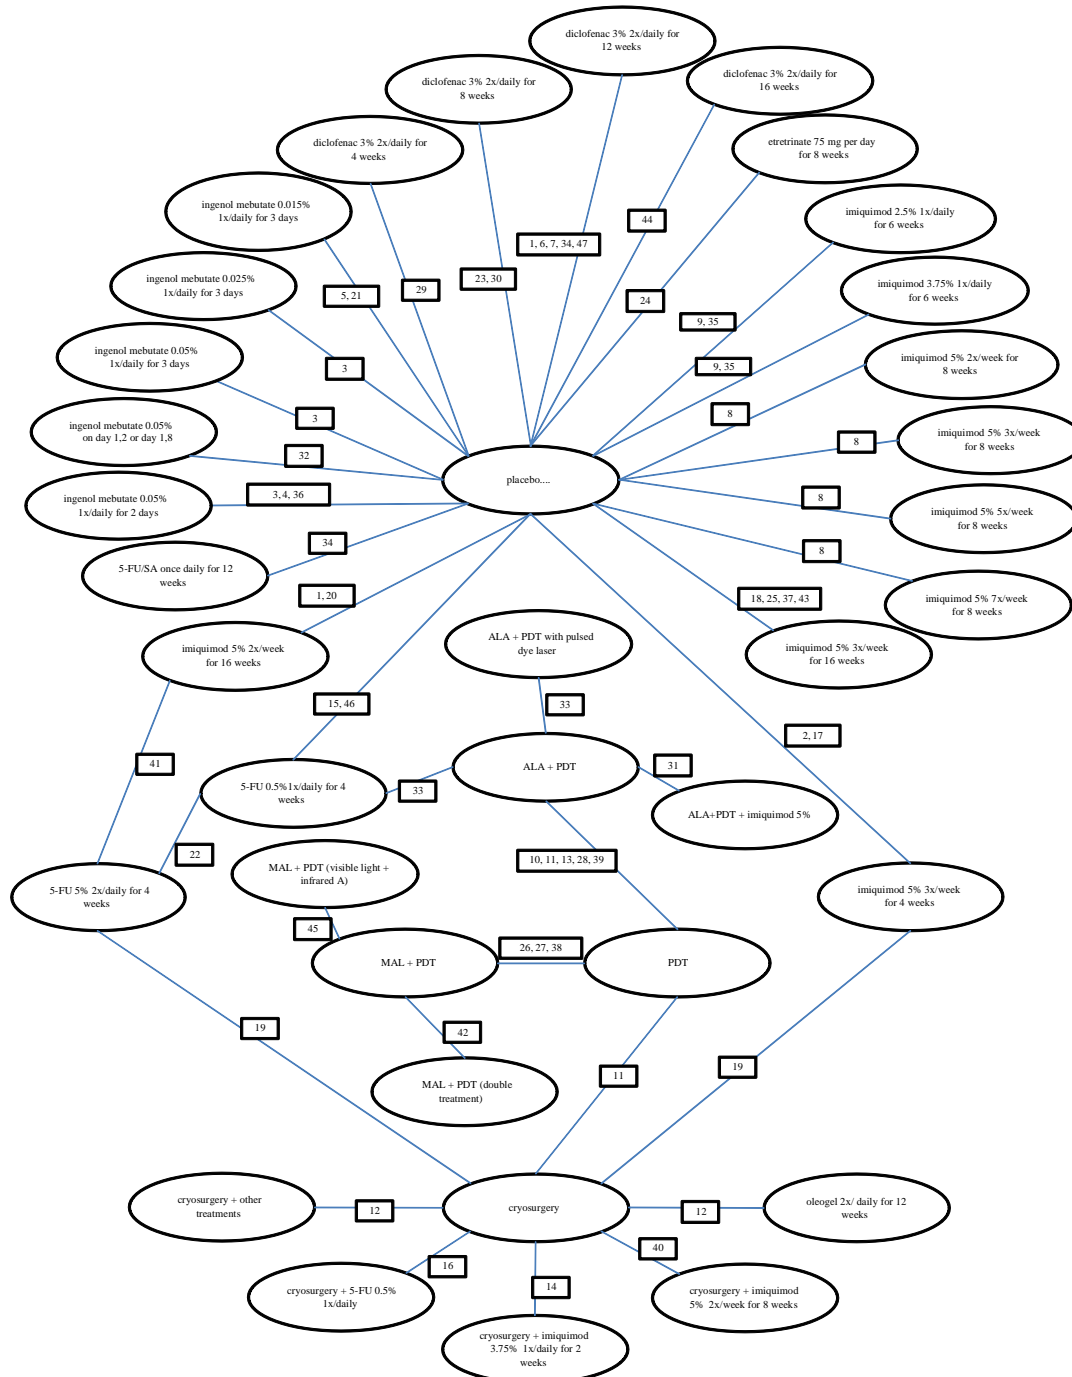

1 Akarsu 2011; 2 Alomar 2007; 3 Anderson 2009; 4 Anderson 2010; 5 Berman 2010; 6 Fariba 2006; 7 Gebauer 2003; 8 Gebauer 2009; 9 Hanke 2010; 10 Hauschild; Szeimies 2009b; 2010b (AK-03); 11 Hauschild; Szeimies 2009b; 2010b (AK-04); 12 Huyke 2009; 13 Jeffes 2001; 14 Jorizzo; Lee 2010; 2011; 15 Jorizzo 2002; 16 Jorizzo 2004; 2006; 17 Jorizzo 2007; 18 Korman 2005; 19 Krawtchenko 2007; 20 Lebowhl 2004; 21 Lebowhl 2010; 22 Loven; Levy 2002; 2001; 23 McEwan 1997; 24 Moriarty 1982; 25 Ooi 2006; 26 Pariser 2003; 27 Pariser 2008; 28 Piacquadro; Fowler 2002 2004; 2002; 29 Rivers 2002a; 30 Rivers 2002b; 31 Shaffelburg 2009; 32 Siller 2009; 33 Smith 2003; 34 Stockfleth 2011; 35 Swanson 2010a; 36 Swanson 2010b; 37 Szeimies 2004; 38 Szeimies 2009; 39 Szeimies 2010a; 40 Tan 2007; 41 Tanghetti 2007; 42 Tarstedt 2005; 43 Ulrich 2007; 44 Ulrich 2010a; 2010; 45 von Felbert 2010; 46 Weiss 2002; 47 Wolf 2001

*Figure 1B. Network of evidence for the complete clearance*

NMAs estimate the relative CC efficacy of each treatment in the network compared with all other treatments in the analysis (Figure 1B). For the NMA of dichotomous endpoints, a binomial likelihood with a logit link was used to calculate the OR for all treatments compared with other treatments. The base case models were random-effects models that allow the true treatment effect to vary between studies due to heterogeneity. In these NMAs, a uniform uninformative prior was used for the between-studies standard deviation. Model fit was assessed using the deviance information criteria.

CC rates were identified for all potential (labeled) AK treatment options. LORs estimated for the treatments were converted to exponents and then applied to the baseline odds of clearance with vehicle gel (placebo). This was achieved by multiplying the odds of CC by the OR with the associated treatment. The odds were then converted to probabilities of CC for use as data inputs in the model. If the odds in favor of CC were known, the probability was calculated as follows: Probability = odds/((1+odds)). Due to the limited available data, a similar NMA was not performed on recurrence rates or LSRs. However, the identified publications were used to estimate figures for recurrences and LSRs. Efficacy data for the analysis are presented in Table 1F below.

*Table 1F. Complete clearance for all locations (random effects were used in the base case analysis, relevant comparators shown)*

| Treatment                        | Odds ratio vs. placebo (95% CrI) |                      | Value in the CUA, ln(OR) <sup>‡</sup> |
|----------------------------------|----------------------------------|----------------------|---------------------------------------|
|                                  | Fixed effects                    | Random effects       |                                       |
| Cryosurgery                      | 4.395 (1.421,13.12)*             | 5.438 (0.884,35.27)  | 1.693                                 |
| Diclofenac 3% 2x/daily, 12 wks   | 5.077 (3.283,8.143)*             | 5.259 (2.027,13.76)* | 1.660*                                |
| Imiquimod 3.75% 1x/daily, 6 wks  | 8.855 (5.273,15.84)*             | 9.101 (2.436,35.57)* | 2.208*                                |
| Imiquimod 5% 3x/wk, 4 wks        | 17.17 (10.36,29.81)*             | 25.47 (7.837,90.13)* | 3.238*                                |
| Imiquimod 5% 3x/wk, 8 wks        | 10.4 (0.499,3713)                | 10.45 (0.304,3185)   | 2.347                                 |
| MAL+PDT                          | 208.1 (51.56,824)*               | 249 (21.63,3055)*    | 5.517*                                |
| IngMeb 0.015% once daily, 3 days | 19.88 (10.63,42.27)*             | 22.15 (5.397,93.47)* | 3.098*                                |
| IngMeb 0.05% 1x/daily, 2 days    | 8.726 (5.205,15.18)*             | 8.868 (2.815,28.21)* | 2.182*                                |

wk = week. <sup>‡</sup> Converted from OR to LN(OR). \* Credible difference in comparison to placebo.



## Appendix 2. Two-year secondary (i.e. specialist) care costs due to actinic keratosis

Table 2A. Secondary care cost results related to actinic keratosis (AK) by the first-line treatment and for patients with incident AK diagnosis (ICD 10 primary diagnosis L57; 10 year controlling; organ transplantation patients excluded) data during calendar year 2009; two-year follow-up from the AK diagnosis

| <b>Resources per patient</b>        |               |                    |                 |
|-------------------------------------|---------------|--------------------|-----------------|
| <i>1st year</i>                     | <i>PDT</i>    | <i>Cryotherapy</i> | <i>Topicals</i> |
| Visits                              | 3.8727        | 1.8434             | 1.7459          |
| Days                                | 0.0000        | 0.0000             | 0.0268          |
| <i>2nd year</i>                     | <i>PDT</i>    | <i>Cryotherapy</i> | <i>Topicals</i> |
| Visits                              | 0.6909        | 0.3255             | 0.3034          |
| Days                                | 0.0000        | 0.0000             | 0.0000          |
| <i>Total 2 years</i>                | <i>PDT</i>    | <i>Cryotherapy</i> | <i>Topicals</i> |
| Visits                              | 4.5636        | 2.1689             | 2.0493          |
| Days                                | 0.0000        | 0.0000             | 0.0268          |
| <b>Costs (€2013) per patient</b>    |               |                    |                 |
| <i>1st year</i>                     | <i>PDT</i>    | <i>Cryotherapy</i> | <i>Topicals</i> |
| Treatment                           | 689.06        | 806.11             | 300.40          |
| Travelling*                         | 145.34        | 69.06              | 69.06           |
| Subtotal                            | 834.40        | 875.17             | 369.46          |
| <i>2nd year, not discounted</i>     | <i>PDT</i>    | <i>Cryotherapy</i> | <i>Topicals</i> |
| Treatment                           | 122.44        | 129.68             | 42.98           |
| Travelling*                         | 25.93         | 12.19              | 11.96           |
| Subtotal                            | 148.37        | 141.87             | 54.94           |
| <i>2nd year, discounted</i>         | <i>PDT</i>    | <i>Cryotherapy</i> | <i>Topicals</i> |
| Treatment                           | 118.77        | 125.79             | 41.69           |
| Travelling*                         | 25.15         | 11.83              | 11.60           |
| Subtotal                            | 143.92        | 137.62             | 53.29           |
| <i>Total 2 years not discounted</i> | <i>PDT</i>    | <i>Cryotherapy</i> | <i>Topicals</i> |
| Treatment                           | 811.50        | 935.79             | 343.38          |
| Travelling*                         | 171.27        | 81.25              | 81.02           |
| Total                               | 982.77        | 1017.04            | 424.40          |
| <i>Total 2 years, discounted</i>    | <i>PDT</i>    | <i>Cryotherapy</i> | <i>Topicals</i> |
| Treatment                           | <u>807.82</u> | <u>931.90</u>      | <u>342.09</u>   |
| Travelling*                         | 170.50        | 80.89              | 80.66           |
| Total                               | 978.32        | 1012.79            | 422.75          |

Cryotherapy = QAA50, QBA50, QCA50, QDA50, QXA50, ZXC50. PDT = WXQ40–WXQ44, DQ004. \*For the societal sensitivity analysis scenario, travelling costs of €37.53/roundtrip travel [100, 101] were also included.
